1 **Crosskingdom growth benefits of fungus-derived phytohormones in Choy Sum**

2  
3  
4 Keyu Gu<sup>1,\*</sup>, Shruti Pavagadhi<sup>2,3</sup>, Yoon Ting Yeap<sup>2</sup>, Cheng-Yen Chen<sup>1</sup>, Sanjay Swarup<sup>2,3,4</sup>,  
5 Naweed I. Naqvi<sup>1,2,\*</sup>

6  
7 <sup>1</sup>Temasek Life Sciences Laboratory, 1 Research Link, Singapore 117604

8 <sup>2</sup>Department of Biological Sciences, 16 Science Drive 4, National University of Singapore,  
9 Singapore 117558

10 <sup>3</sup>Singapore Centre for Environmental Life Sciences Engineering, 60 Nanyang Drive,  
11 Singapore 637551

12 <sup>4</sup>NUS Environmental Research Institute, National University of Singapore, Singapore 117411

13  
14  
15 **RUNNING TITLE:** Phytohormone mimics in plant growth

16  
17  
18 **\* CORRESPONDENCE:**

19  
20 Naweed Naqvi (naweed@tll.org.sg) or Gu Keyu (gukeyu18@gmail.com)

51 **ABSTRACT**

52

53 Soil-borne beneficial microbes establish symbioses with plant hosts, and play key roles  
54 during growth and development therein. In this study, fungal strains FLP7 and B9 were  
55 isolated from the rhizosphere microbiome associated with Choy Sum (*Brassica rapa* var.  
56 *parachinen-sis*) and barley (*Hordeum vulgare*), respectively. Sequence analyses of the  
57 internal transcribed spacer and 18S ribosomal RNA genes combined with colony and conidial  
58 morphology identified FLP7 and B9 to be isolates of *Penicillium citrinum*. Plant-fungus  
59 interaction assays revealed that B9, but not FLP7, showed significant growth promotion  
60 effect in Choy Sum cultivated in normal soil, whereas FLP7 enhanced Choy Sum growth  
61 under phosphate-limiting condition. In comparison to the mock control, B9-inoculated plants  
62 showed a 34% increase in growth in aerial parts, and an 85% upsurge in the fresh weight of  
63 roots when cultivated in sterilized soil. The dry biomass of inoculated Choy Sum increased  
64 by 39% and 74% for the shoots and roots, respectively. Root colonization assays showed that  
65 *P. citrinum* associates directly with the root surface but does not enter/invade the roots of  
66 inoculated Choy Sum plants. Preliminary results also indicated that *P. citrinum* can promote  
67 growth in Choy Sum via volatile metabolites too. Interestingly, we detected relatively higher  
68 amounts of indole acetic acid and cytokinins in axenic *P. citrinum* culture filtrate through  
69 liquid-chromatography mass-spectrometry analyses. This could plausibly explain the overall  
70 growth promotion in Choy Sum. Furthermore, the phenotypic growth defects associated with  
71 the *Arabidopsis gal* mutant could be chemically complemented by the exogenous application  
72 of *P. citrinum* culture filtrate, which also showed accumulation of fungus-derived active  
73 gibberellins. Our study underscores the importance of trans-kingdom beneficial effects of  
74 such mycobiome-derived phytohormone-like metabolites in host plant growth.

75

76 **KEYWORDS**

77

78 Choy Sum, *Penicillium citrinum*, growth promotion, indole acetic acid, Gibberellin,  
79 Cytokinin, Phytohormone.

80

81

82

83

84

85

86

87

88

89

90

91

92

93

94

95

96

97

98

99

100

## 101 INTRODUCTION

102

103 Mycorrhizal microbes play an important role in growth, reproduction, and stress tolerance in  
104 plant hosts. The strategies include the production of phytohormones, development of lateral  
105 root branching and root hair, and improved absorption of nutrients. For example, plant  
106 growth-promoting rhizobacteria (PGPR) colonize roots and enhance plant growth directly  
107 and indirectly (Vacheron et al., 2013; Mabood et al., 2014). *Penicillium oxalicum* P4 and  
108 *Aspergillus niger* P85 can solubilise phosphate (P) and promote maize growth (Yin et al.,  
109 2015). Further studies verified that 7 and 4 organic acids showed strong increase associated  
110 with isolate P4 and P85 (Yin et al., 2015). Gibberellin mimics produced by fungi play a vital  
111 role in plant growth and development. *Penicillium commune* KNU5379 produces more active  
112 variants of Gibberellic acid (GA) such as GA3, GA4 and GA7 (Choi et al., 2005). On the  
113 other hand, fungus-derived indole acetic acid (IAA) also plays a significant role in plant  
114 growth. For instance, *Penicillium menonorum* displayed growth-promoting activity through  
115 IAA and siderophore production (Babu et al., 2015). When inoculated with *Penicillium*  
116 *menonorum* KNU-3, the dry biomass of cucumber roots and shoots increased by 57% and  
117 52%, respectively (Babu et al., 2015). Similarly, in Arabidopsis, three fungal endophytes  
118 from water mint can increase the fresh and dry weight of Arabidopsis at 14 and 21 days post  
119 inoculation. Among them, *Phoma macrostoma* can increase both root area and depth at 21  
120 days (Dovana et al., 2015). Other isolates from *Phoma* and *Penicillium* showed similar  
121 effects. The *Phoma glomerata* and *Penicillium* species. can significantly increase chlorophyll  
122 content in leaves, and fresh and dry weight of shoots (Waqas et al., 2012). Further analyses  
123 detected active Gibberellins such as GA1, GA3, GA4, and GA7; and auxin in the pure  
124 cultures from those two strains (Waqas et al., 2012). *Penicillium pinophilum* formed  
125 arbuscular mycorrhizae, which increase the plant dry weight, nitrogen content, P content and  
126 photosynthesis rate by 31%, 47%, 57% and 71%, respectively (Fan et al., 2008). *Talaromyces*  
127 *pinophilus*, an endophytic fungus isolated from halophytic plants of Korea can increase the  
128 plant height in comparison with the uninoculated wild type (Khalmuratova et al., 2015).

129

130 Green leafy vegetables are an important source containing many nutrients. As a non-  
131 mycorrhizal Brassicaceae species, Choy Sum is a common vegetable in our daily diet.  
132 However, current studies of mycorrhizal microbes mainly focus on bacterial communities,  
133 the vegetable associated mycorrhizal fungal species are scarce. In order to identify the  
134 phytohormone-secreting (GA, cytokinin and IAA) fungi, which can promote overall growth  
135 and biomass increase in green leafy vegetables, we isolated several mycobiome species from  
136 the roots of Choy Sum (*Brassica rapa* var. *parachinensis*) and barley (*Hordeum vulgare*).  
137 Among the one hundred isolated fungi, two isolates, FLP7 and B9, showed promising growth  
138 phenotypes in Choy Sum in the laboratory and in soil-based greenhouse cultivation; through  
139 secreted phytohormones such as GA, cytokinin or IAA. Our results demonstrate that  
140 symbioses with beneficial fungi play an important role in promoting plant growth and  
141 increasing agricultural productivity.

142

## 143 RESULTS AND DISCUSSION

144

### 145 Isolation of Beneficial Fungi That Enhance Plant Growth

146

147 A fungal strain, termed B9, was isolated from the roots of two-week old barley seedlings. The  
148 sequencing results of internal transcribed spacer (ITS), large subunit (LSU) and small subunit  
149 (SSU) of 18S nuclear ribosomal RNA genes identified B9 to be a *Penicillium citrinum* isolate.  
150 The plant-fungus interaction assays were conducted to check if B9 can induce or promote

151 growth in green leafy vegetables. The results indicated that B9 can significantly increase the  
152 growth in Choy Sum plants in sterilized soil as well as in non-autoclaved soil (**Figure 1**).  
153 Overall, the B9-inoculated plants were larger and grew taller than the un-inoculated controls  
154 (**Figure 1A-1D**). Compared with mock control, the fresh and dry weight of aerial parts in the  
155 B9-inoculated plants increased by 34.8%, 39.5%, 41.2% and 25.4% in the sterilized or non-  
156 sterile soil, respectively (**Figure 1E-1H**;  $n=24$ ,  $P<0.05$ ). Similarly, the fresh and dry weight  
157 of roots increased by 85.4%, 74.9%, 83% and 42.4% under the respective conditions (**Figure**  
158 **1E-1H**). These data helped us conclude that the B9 isolate of *P. citrinum* can significantly  
159 promote growth in Choy Sum both in the presence or absence of resident commensal  
160 microbiota in the rhizosphere.

161  
162 In another experiment, 32 fungal strains belonging to 11 genera were isolated from the roots  
163 of Choy Sum grown on Murashige Skoog agar medium with low amounts of phosphate. Of  
164 these promising fungal isolates, FLP7 was also tested for growth promotion effects in the  
165 common Brassica vegetable Choy Sum in the greenhouse. The results demonstrated that,  
166 unlike B9, FLP7 does not promote growth in Choy Sum (**Supplementary Figure S1A-F**).  
167 The morphological traits of Choy Sum inoculated with FLP7 were similar to those in the  
168 mock controls. Furthermore, the fresh and dry weight of shoots and roots between FLP7 and  
169 its corresponding mock control did not show any significant differences (**Supplementary**  
170 **Figure S1C-F**). Interestingly, FLP7 was also identified as *Penicillium citrinum* based on ITS  
171 sequence analysis; and showed highly similar phenotypic characteristics as B9 in colony and  
172 conidial morphology (**Supplementary Figure S2A-D**). We conclude that unlike B9, the *P.*  
173 *citrinum* isolate FLP7 has no growth promotion effect in Choy Sum cultivated in soil under  
174 such nutrient-rich conditions.

#### 175 176 ***P. citrinum* (FLP7) Improves Choy Sum Growth Under Phosphate-limiting Conditions**

177  
178 A previous report showed that the root endophyte *Colletotrichum tofieldiae* (*Ct*) promotes  
179 Arabidopsis growth under phosphate deficient condition (Hiruma et al., 2016). However, *Ct*  
180 did not display growth promotion under phosphate replete condition (Hiruma et al., 2016).  
181 Since FLP7 was isolated from seedlings grown on growth medium containing low levels of  
182 phosphate, we tested whether the ability (if any) to promote growth in the host plants is also  
183 restricted to phosphate-limiting conditions. To further investigate this, sterilized soil with  
184 very low phosphate content (0.11% (w/w)) was used to test this hypothesis. In comparison to  
185 mock treatment with sterile water, the Choy Sum seedlings grown on low phosphate soil  
186 inoculated with FLP7 conidia showed a significant increase in overall growth and size of the  
187 plants (**Figure 2**;  $p<0.05$ ). The average leaf area, the root length, the dry weight of roots and  
188 shoots were 5.7, 2.0, 3.3 and 3.9 times of the control (**Figure 2**). We infer that the FLP7  
189 isolate of *P. citrinum* can indeed improve the overall growth of Choy Sum likely via  
190 facilitating the availability and/or uptake of phosphate in the host under low Pi conditions.

#### 191 192 ***P. citrinum* Isolates Enhance Choy Sum Growth Via Volatile Secondary Metabolites**

193  
194 Previous studies demonstrated that some beneficial fungi can secrete volatile organic  
195 compounds/metabolites to trigger plant growth and development (Hung et al., 2013; Naznin  
196 et al., 2013; Jalali et al., 2017). To investigate if FLP7 and B9 can induce similar VOC-based  
197 growth stimulation, we incubated the 4-day old Choy Sum seedlings with FLP7 or B9 strain  
198 in Phytatray II boxes (Sigma-Aldrich) for 10 days. Barium hydroxide was added to the  
199 experimental set-up to quench excess CO<sub>2</sub>, in order to rule out its beneficial effects in plant  
200 growth. The tests for such volatile compounds indicated that compared to the mock control



201 (prune agar medium), the size of the seedlings co-cultivated in Phytatray II with B9- or  
202 FLP7-isolate was significantly larger (**Figure 3A-C; n=18,  $P<0.05$** ). The fresh and dry  
203 weight of shoots and roots of seedlings incubated with FLP7 was 1.46, 1.14, 2.22 and 2.28  
204 times higher than that of the respective mock controls (**Figure 3C-F**). Furthermore, the fresh  
205 and dry weight of shoots and roots of the seedlings incubated with B9 was 1.98, 1.63, 2.28  
206 and 2.35 times than that of the un-inoculated control plants (**Figure 3C-F**). We infer that *P.*  
207 *citrinum* secretes some putative volatile compound(s), which are likely responsible for  
208 indirectly imparting such beneficial effects on the growth of Choy Sum.

209

### 210 **Analysing the Colonization of Plant Roots by *P. citrinum* Isolates**

211

212 To further investigate the mode of interaction of FLP7 and B9 in colonizing the roots of Choy  
213 Sum, these two isolates were transformed with the gene expressing a cytosolic enhanced  
214 green fluorescent protein. The resultant transformants were verified by PCR and sequencing,  
215 and the fungal strains expressing the cytosolic eGFP were used for Choy Sum root  
216 inoculation assays. The invasive hyphal growth of eGFP-expressing FLP7 was visualized at  
217 12 hours after inoculation. However, no intracellular invasion or colonization within the roots  
218 was evident even at 3 days post inoculation (**Figure 4A**). Similarly, the eGFP-tagged B9  
219 strain was used to incubate with 4-day old Choy Sum seedlings. Confocal microscopy  
220 revealed that like FLP7, the hyphae of B9 strain of *P. citrinum* also contact and adhere to the  
221 surface of Choy Sum roots (**Figure 4B**), but do not enter or colonize the root epidermal cells  
222 *per se*. These results demonstrated that the FLP7 and B9 isolates of *P. citrinum* impart the  
223 beneficial effects via surface attachment and biotrophic interactions with Choy Sum roots.

224

### 225 **Beneficial *P. citrinum* Isolates Produce Mimics of Gibberellin, Auxin and Cytokinin**

226

227 Given their strong growth-enhancing effect in the host plants, we decided to evaluate whether  
228 *P. citrinum* isolates produce/secrete any growth-promoting secondary metabolites or  
229 phytohormones. Towards this end, the axenic culture filtrates of FLP7 and B9 were analysed  
230 using liquid chromatography-mass spectrometry (LC-MS) together with the requisite  
231 standards for 3 major plant hormones: Gibberellins (GA), Indole acetic acid (IAA/auxin) and  
232 Cytokinins. Phytohormone detection was performed using optimized reaction monitoring  
233 conditions for the requisite standards as detailed in **Supplementary Figures S3-S5**, and  
234 **Supplementary Table S1**. These results demonstrated that the bioactive GAs including GA1  
235 and GA3, and the inactive GA20 variant are present in the culture filtrate of the FLP7 isolate  
236 of *P. citrinum* (**Table 1; Supplementary Figure S6A**). However, the results were variable  
237 possibly due to the low abundance and/or stability of GAs produced and secreted by the  
238 fungus; and the GA-related inter-conversions since only selected GAs were monitored in this  
239 study. In order to determine if the GA-like compounds produced by *P. citrinum* are  
240 functionally active, an Arabidopsis gibberellin-deficient mutant, *gal1*, and its isogenic wild-  
241 type Col-0 accession were germinated on growth medium lacking or containing the culture  
242 filtrate of FLP7 or B9 (**Figure 5**). After 9 days, the *gal1* mutant supplemented with FLP7  
243 culture filtrate (but not B9), showed shoot elongation and early flowering (**Figure 5A**). In  
244 addition, the wild-type Arabidopsis plants treated with cell-free exudate of FLP7 showed  
245 early flowering (**Figure 5B, lower**) compared to the mock treated control (**Figure 5B,**  
246 **upper**). Based on such chemical complementation analysis, we conclude that the *P. citrinum*  
247 FLP7 strain indeed produces minor albeit significant amounts of functional GA, which are  
248 sufficient *in trans* to suppress the growth defects in the *gal1* mutant of Arabidopsis.

249

250 Likewise, auxin was also found in the culture filtrate of the B9 isolate of *P. citrinum* (**Table 1**;  
251 **Supplementary Figure S6B**). On the contrary, no auxin or gibberellins could be detected  
252 from the mock control (un-inoculated growth medium) or in the mycelial extracts (**Table 1**),  
253 indicating that the IAA and GA detected in the fungal culture filtrates were most likely  
254 secreted by *P. citrinum* and not sourced from the growth medium *per se*. This also suggests  
255 that these two fungal phytohormone mimics are likely secreted extracellular metabolites.  
256 Based on these results, we conclude that growth benefits imparted by *P. citrinum* are due in  
257 part to the secreted fungal phytohormone mimics of gibberellin and/or auxin. We infer that  
258 plants could likely receive such auxin derivatives through fungal secretions, and a direct  
259 contact or interaction with the roots was likely required for such transkingdom effects of  
260 fungal phytohormones.

261  
262 Paclobutrazol is a known inhibitor of gibberellin biosynthesis in plants (Fletcher et al.,  
263 2000; Verma et al., 2010). Gibberellin was undetectable in culture filtrates and/or the  
264 corresponding mycelia from FLP7 treated with 10  $\mu$ M Paclobutrazol (**Table 1**). This result  
265 indicates that the biosynthesis of fungal GA is blocked in Paclobutrazol-treated *P. citrinum*,  
266 whereas auxin accumulation is unaffected. In contrast, the control set without the inhibitor,  
267 showed the presence of gibberellin and auxin in the culture filtrates of both the isolates of *P.*  
268 *citrinum* (**Table 1**).

269  
270 Next, we investigated the effect of *P. citrinum* exudates on seed germination, growth and  
271 development of Choy Sum. As indicated in **Figure 5C**, Choy Sum seeds germinated better  
272 and produced robust roots on growth medium supplemented with the culture filtrate from  
273 FLP7 or B9. However, the addition of Paclobutrazol-treated growth medium significantly  
274 inhibited the germination and growth of Choy Sum seedlings (**Figure 5C**), which underscores  
275 the specific inhibitory effects of Paclobutrazol on production and activity of fungal  
276 gibberellins, and their importance in plant growth promotion by *P. citrinum*.

277  
278 To elucidate why both FLP7 and B9 can promote growth via volatile metabolites, but only  
279 B9 can do so in the soil, both strains were further inoculated in complete medium and grown  
280 at 28<sup>0</sup>C for 7 days in the dark. The culture filtrates were harvested from the two isolates and  
281 freeze-dried samples processed for LC-MS analysis. The resultant data showed that relatively  
282 higher amount of auxin (a phytohormone mimic) is likely produced and secreted by the B9  
283 isolate of *P. citrinum* as compared to the FLP7 strain (**Supplementary Figure S6B**). Auxin  
284 was undetectable in the un-inoculated complete medium (**Table 1**), or in the mycelia from  
285 FLP7 or B9 (**Table 1**). To confirm this analysis, we incorporated 10  $\mu$ M Paclobutrazol into  
286 the complete medium together with fungal strains FLP7 or B9 and the samples were analysed  
287 by LC-MS. Likewise, only auxin but no Gibberellin was detected in FLP7 and B9 culture  
288 filtrates supplemented with the inhibitor (**Table 1**). Similarly, the aforementioned  
289 phytohormones were undetectable/absent in the mycelial extracts from FLP7 and B9 treated  
290 with the gibberellin inhibitor (**Table 1**).

291  
292 Apart from Gibberellin and auxin, we also evaluated the presence of two cytokinins in the  
293 cell-free culture filtrates of these 2 isolates as well as in media extracts. We detected both  
294 trans-Zeatin and trans-Zeatin riboside in media extracts (albeit minor amounts) as well as in  
295 B9 and FLP7 culture filtrates. However, as in the case with auxin, we observed relatively  
296 higher amounts of these cytokinins in B9 as compared to the FLP7 exudate (**Supplementary**  
297 **Figure S6C**). Taken together, we infer that *P. citrinum* (B9 isolate) produces relatively  
298 higher amounts of auxin and two cytokinins in addition to the active Gibberellin derivatives,  
299 which together likely lead to the crosskingdom increase in growth in B9-inoculated Choy

300 Sum plants. However, detailed analytical studies are warranted to obtain further conclusive  
301 insights about these phytohormones mimics or derivatives in inducing growth in the host  
302 plants.

303

304 We conclude that the FLP7 and B9 isolates of *P. citrinum* transiently associate with the host  
305 root surface, and root colonization *per se* is likely not mandated for the observed beneficial  
306 effects. The fungus-derived phytohormones likely play a key role in promoting robust growth  
307 and increased biomass in Choy Sum, an economically important urban vegetable crop in  
308 Singapore and Asia.

309

### 310 **Similarity and Differences Between the FLP7 and B9 Isolates of *P. citrinum***

311

312 PCR amplification using three pairs of primers for ITS, and Large- or Small-subunit of  
313 ribosomal genes (**Table 2**), and the sequence analyses indicated that both FLP7 and B9  
314 are isolates of *P. citrinum*. However, when these fungal strains were grown on rich medium  
315 for 3 days, different pigments (based on color change) accumulated at the base of the colony  
316 (**Supplementary Figure 2A-2B**). The colonies and conidia produced by B9 and FLP7 were  
317 highly similar in size and morphology (**Supplementary Figure 2C-2D**). We infer that these  
318 phenotypic differences in the colonies of FLP7 and B9 may reflect the metabolic adaptation  
319 to different plant host genotypes/ sources and/or the prevalent growth conditions.

320 Additionally, the B9 mycelia might secrete additional as yet unidentified compounds or  
321 secondary metabolites during interaction with the host plants. Lastly, both FLP7 and B9  
322 showed growth promotion effect via volatile compounds, but differed in their ability to  
323 enhance growth in phosphate-replete conditions; and in the relative levels of the  
324 phytohormones gibberellin, auxin and cytokinin produced *in vitro* during mycelial  
325 growth. Global metabolomics analyses and whole genome sequencing will likely be required  
326 in the future to address these differences between FLP7 and B9 isolates of *P. citrinum*.

327

### 328 **Production of Phytohormone Mimics by *P. citrinum***

329

330 This study adds to the emerging role and importance of microbiome-derived phytohormone  
331 mimics that contribute to the functional aspects of growth benefits in the host plants. Many  
332 fungi have been shown to produce phytohormones such as auxin and gibberellins (Hasan,  
333 2002;Choi et al., 2005;Nassar et al., 2005;Rim et al., 2005;Khan et al., 2012;Waqas et al.,  
334 2012). For example, auxin can be detected in the cultures of *P. glomerate* and *Penicillium sp.*,  
335 which increases the plant biomass and related growth parameters under abiotic stress  
336 conditions (Waqas et al., 2012). The endophytic yeast *Williopsis saturnus* was found to be  
337 capable of producing auxin and indole-3-pyruvic acid *in vitro*, which significantly enhanced  
338 the growth in maize plants under gnotobiotic condition and in soils supplemented with or  
339 without L-TRP (Nassar et al., 2005). The auxin and Gibberellin(s) produced by *Paecilomyces*  
340 *formosus* were, likewise, implicated in increased growth in rice seedlings (Khan et al., 2012).  
341 Similarly, *Fusarium oxysporum*, also produces IAA (Hasan, 2002). In this study, both B9 and  
342 FLP7 isolates of *P. citrinum* produced IAA and/or GAs in varying albeit functionally  
343 significant amounts during the interaction with Choy Sum (**Table 1**).

344

345 Even though both isolates belong to *P. citrinum*, B9 seems to produce relatively higher  
346 amounts of auxin and cytokinin (Supplementary Figure S6), thus indicating the adoption of  
347 different strategies or metabolic responses during interaction with the host plants. It remains  
348 to be seen whether such phytohormone mimics play a role in fungal growth, development and  
349 adaptation *per se*. Future studies will focus on understanding the spatiotemporal regulation of

350 such (fungal) phytohormone mimics and the pathways that regulate the crosskingdom  
351 transport to specific subcellular compartments thus leading to enhanced growth in the host  
352 tissues.

353

## 354 CONCLUSION

355

356 Under natural conditions, rhizosphere microbes have different interactions with the plant  
357 hosts ranging from commensalism to mutualism. Reciprocally, plants can also shape the  
358 rhizosphere microbiome for its growth, development, and abiotic- and biotic-stress tolerance.  
359 Although many studies have been conducted, the understanding of molecular mechanisms  
360 associated with the beneficial microbe and host interactions is still far from complete. Next-  
361 generation sequencing technology, combined with the development of metatranscriptomics,  
362 metaproteomics and metabolomics, will push forward the understanding between host and the  
363 rhizosphere microbes. In this study, we showed that beneficial *P. citrinum* isolates can  
364 promote growth in Choy Sum (an important crop for urban farming, and for food and  
365 nutritional security) by secreting phytohormone(s) mimics and putative volatile compounds.  
366 We demonstrated that rhizosphere fungi can be considered as a useful resource, which can  
367 enhance soil fertility and promote plant growth. Integrating the knowledge of mycobiome  
368 community composition, beneficial microbial consortia, volatile signals and mutual  
369 interactions could aid in sustainable agriculture in an urban setting. Future studies will be  
370 directed at understanding the physiology and mechanism-of-action of fungal phytohormone  
371 mimics in cross-kingdom growth promotion and resilience in important crop plants.

372

## 373 MATERIALS AND METHODS

374

### 375 Fungal Isolation and Identification

376

377 Choy Sum seeds were surface sterilized and germinated on Murashige and Skoog medium  
378 with low amount of phosphate (12.5  $\mu$ M). The roots were harvested, ground in 1x phosphate  
379 buffered saline and the suspension was diluted and plated on Prune agar medium (40 ml/L  
380 prune juice, 1 g/L yeast extract, 2.5 g/L lactose, 2.5 g/L sucrose, 20 g/L agar, pH 6.5)  
381 supplemented with Tetracycline (5  $\mu$ g/ml) + Streptomycin (100  $\mu$ g/ml) + Carbenicillin (50  
382  $\mu$ g/ml) + Kanamycin (50  $\mu$ g/ml). In parallel, the roots were collected from about two-week  
383 old barley plants and brought to the laboratory for further processing. The roots were washed  
384 with normal water to remove the attached soil and then with distilled water for 30 minutes.  
385 After that, the roots were sterilized with 70% ethanol for 1-2 minutes and rinsed with distilled  
386 water for 10 minutes. The sterilized roots were cut and ground using a mortar and pestle. The  
387 homogenate was filtered with two layers of sterilized miracloth and diluted and plated on  
388 growth medium as above. The plates were incubated at 28<sup>0</sup>C for 2-3 days, and individual  
389 fungal colonies were subcultured several times on PA medium. The mycelial mats from a  
390 purified single colony were used to colonize 3MM discs, dried and stored at -20<sup>0</sup>C. The dried  
391 mycelial disc was inoculated in 10 ml of CM and incubated at 28<sup>0</sup>C, 180 rpm for 2 days, and  
392 the resulting mycelia collected for DNA extraction.  
393 The genomic DNA from the mycelia was extracted using the MasterPure<sup>TM</sup> Yeast DNA  
394 Purification kit (Lucigen) and used subsequently for PCR amplification. The PCR products  
395 were purified and sequenced. The sequences were used for NCBI BLAST analyses. The PCR  
396 primer pairs are listed in **Table 2**. The PCR protocol used was 95<sup>0</sup>C for 5 min; 35 cycles of  
397 95<sup>0</sup>C for 30 s, 48<sup>0</sup>C for 30 s, and 72<sup>0</sup>C for 1.5 min, 72<sup>0</sup>C for 5 min; 95<sup>0</sup>C for 5 min, 35 cycles  
398 of 95<sup>0</sup>C for 30 sec, 52<sup>0</sup>C for 30 sec, and 72<sup>0</sup>C for 1.5 min, 72<sup>0</sup>C for 5 min and 95<sup>0</sup>C for 5 min,



399 35 cycles of 95°C for 30 sec, 60°C for 30 sec, and 72°C for 30 sec, 72°C for 5 min,  
400 respectively.

401

### 402 **Plant Growth-Promotion Assays**

403

404 Seeds from Choy Sum or the *Arabidopsis gal* mutant were surface sterilized and placed on  
405 Murashige Skoog medium for germination. The Choy Sum seedlings were transplanted to  
406 autoclaved or non-autoclaved soil at 4 dpi, respectively. The *gal* mutant seedlings were  
407 transplanted to Phytatray II boxes containing MS medium supplemented with cell-free  
408 culture filtrate from FLP7 or B9. The selected fungal mycelial mat grown on PA medium at  
409 28°C for 3 days in darkness, and then cultivated under constant light for 5 days. The conidia  
410 were collected and diluted to  $1-5 \times 10^5$  spores / mL for inoculation. The inoculated plants  
411 were placed in a growth chamber for 2 days and then cultivated in greenhouse until 21 dpi.  
412 The experiments were repeated three times each using 8-10 seedlings.

413 To assay for growth-promoting volatile metabolites, the Choy Sum seeds were sterilized and  
414 grown on MS medium as described above. The four-day old seedlings in triplicate were  
415 transferred to Phytatray II boxes with MS medium, together with fungal strains grown on  
416 prune agar, and the boxes were incubated at 25°C, 70% relative humidity (RH) (day) and  
417 23°C, 50% RH (night) for 10 days. Barium hydroxide was added to the experimental set-up  
418 to quench excess CO<sub>2</sub>, in order to rule out its indirect beneficial effects in plant growth.

419

### 420 **Agrobacterium-Mediated Transformation of FLP7 or B9**

421

422 Agrobacterium-mediated transformation of target fungi was performed as described  
423 previously (Zheng et al., 2015). *Agrobacterium tumefaciens* strain AGL1 carrying the  
424 appropriate Transfer-DNA vector/plasmid was grown at 28°C in LB medium containing 100  
425 µg/ml Kanamycin overnight. The overnight AGL1 culture was diluted to OD<sub>600</sub>=0.15 in  
426 induction medium (10 mL/L K salts (20.5% K<sub>2</sub>HPO<sub>4</sub>, 14.5% KH<sub>2</sub>PO<sub>4</sub>; M salts: 3% MgSO<sub>4</sub>-  
427 7H<sub>2</sub>O, 1.5% NaCl), 20 mL/L M salts, (20%) NH<sub>4</sub>NO<sub>3</sub> 2.5 mL/L, (1%) CaCl<sub>2</sub> 1 mL/L, (0.01%)  
428 FeSO<sub>4</sub> 10 mL/L, glucose 5 mM/L, MES 40 mM/L, glycerol 0.5%) containing 100 µg/mL  
429 kanamycin and 200 µM acetosyringone, and incubated at 28°C with gentle shaking at 160  
430 rpm for 6 h. Simultaneously, conidia (fungal spores) were harvested from fully grown fungal  
431 cultures (on prune agar medium under light for about 1 week) and re-suspended to  $1 \times 10^6$ /mL  
432 in distilled water. A sterile 0.45 µm nitrocellulose filter membrane was placed on induction  
433 medium containing 200 mM acetosyringone. A mixture of equal volume (100 µl each) of the  
434 AGL1 culture and the fungal conidial suspension was spotted and air-dried on the filter  
435 membrane. The plate was then incubated at 28°C for 48 hours. After the co-culture, all the  
436 growth on the filter membrane was scraped into 2 mL of sterile PBS (containing 200 mM  
437 Cefotaxime, 60 mg/mL Streptomycin and 100 mg/mL Ampicillin) and was vortexed briefly.  
438 The re-suspension in PBS was plated equally (200 µl) onto ten CM selection medium plates  
439 containing 200 µg/mL Cefotaxime (to kill *Agrobacteria*), 60 µg/mL Streptomycin, 100  
440 µg/mL Ampicillin, and 250 µg/mL Hygromycin. The selection plates were incubated at 28°C  
441 until the transformed fungal colonies appeared (typically 3-5 days). The individual colonies  
442 were selected for mycelium preparation and DNA extraction as above. The primer pairs used  
443 for PCR amplification are listed in **Table 2**.

444

### 445 **Fungal Interaction/Colonization Assays In Choy Sum Roots**

446

447 The Choy Sum seed germination and seedling preparation were as described above. The  
448 GFP-expressing FLP7 and B9 strains were prepared as above. The seedlings were submerged

449 in the conidial suspension containing  $1 \times 10^4$  spores / mL. The interaction between Choy Sum  
450 and the GFP-tagged FLP7 or B9 was analyzed by laser-scanning confocal microscopy  
451 (Exciter, Zeiss) using the 10x water-immersion and 63x oil objectives. The  
452 excitation/emission wavelength (Ex/Em) was 488 nm/505-550 nm.  
453

#### 454 **Plant Growth Assay Under Low Phosphate (P) Using FLP7 Isolate**

455

456 The Choy Sum seeds were sterilized and germinated on Murashige Skoog medium with low  
457 phosphate (12.5  $\mu$ M) for 4 days. The germinated seedlings were transplanted to autoclaved  
458 rice soil (with 0.11% (w/w) phosphate) and grew for 21 days like above. During the growth,  
459 no fertilizer was added. The average leaf area ( $\text{cm}^2$ ), root length (cm), the dry weight of roots  
460 and aerial part (mg) were calculated for both control and FLP7-treated seedlings.  
461

#### 462 **Extraction And Purification Methods For Detection of Phytohormones in *P. citrinum***

463

464 Certified standards of Gibberellins GA1, GA4, GA20 were purchased from OiChemIm Ltd  
465 (Czech Republic). Certified GA3 standard, IAA standard and formic acid were purchased  
466 from Sigma-Aldrich (USA). Trans-zeatin and trans-zeatin riboside standards were provided  
467 by Prakash Kumar (Singapore). Acetonitrile with 0.1% formic acid (Optima LC-MS grade)  
468 and methanol (Optima LC-MS grade) were obtained from Fluka Honeywell. Milli-Q water  
469 was used for preparation of mobile phase (Millipore, USA). Prime HLB SPE cartridge (200  
470 mg, 6 cc) and Oasis MCX (200 mg, 6 cc) cartridge were supplied by Waters Corporation, UK.  
471

472 Standard stock solutions (1000  $\mu$ g/mL) of GA1, GA3, GA4, GA20, Auxin, trans-zeatin and  
473 trans-zeatin riboside were prepared in methanol respectively and stored at  $-20^\circ\text{C}$  in the dark.  
474 Stock solutions were used to prepare working standard solutions for analytical experiments.  
475 Extraction procedures for Gibberellin and Auxin were adopted from the methods described  
476 previously (Khan et al., 2011; Khan et al., 2012; Waqas et al., 2012). Briefly, the liquid  
477 complete medium inoculated with FLP7 or B9 was incubated at  $28^\circ\text{C}$  at 180 rpm for 7 days.  
478 The resulting culture was centrifuged, and the culture filtrate used for LC-MS analysis.  
479 Lyophilized fungal culture filtrate was extracted with ethyl acetate containing formic acid and  
480 was loaded onto preconditioned solid-phase extraction cartridge. Subsequently, the column  
481 was washed with distilled water and the sample was eluted with acidified methanol. The  
482 eluate was evaporated to dryness and reconstituted in 50% methanol for further LC-MS/MS  
483 analysis.  
484

485 Extraction of cytokinins (Trans-zeatin and Trans-zeatin riboside) and subsequent sample  
486 clean-up and purification were done using methods adapted from Morrison et al. (2015).  
487 Briefly, cell-free filtrates were snap-frozen, lyophilized and subsequently homogenized in  
488 cold ( $-20^\circ\text{C}$ ) modified Bielecki No. 2 extraction buffer (Methanol: Water: Formic Acid;  
489  $\text{CH}_3\text{OH}:\text{H}_2\text{O}:\text{HCO}_2\text{H}$  [15:4:1, v/v/v]). Samples were allowed to extract passively, twice at  
490  $-20^\circ\text{C}$  and pooled supernatants were dried in a speed vacuum concentrator at ambient  
491 temperature (UVS400, Thermo Fisher Scientific, USA). Dried supernatant residues were  
492 reconstituted in 1 mL 1M  $\text{HCO}_2\text{H}$  and subjected to solid phase extraction on a mixed mode,  
493 reverse-phase, cation-exchange cartridge (Oasis MCX 6 cc; Waters, UK). Trans-zeatin and  
494 trans-zeatin riboside were eluted with 0.35 M  $\text{NH}_4\text{OH}$  in 60%  $\text{CH}_3\text{OH}$ . Samples were  
495 evaporated and stored at  $-80^\circ\text{C}$  prior to analyses. Samples were reconstituted in initial mobile  
496 phase conditions (95:5  $\text{H}_2\text{O}:\text{CH}_3\text{OH}$  with 0.08% acetic acid ( $\text{CH}_3\text{CO}_2\text{H}$ )) prior to analyses.  
497

#### 498 **Liquid Chromatography–Mass Spectrometry**



499

500 LC-MS data were acquired on an Agilent 1290 Infinity coupled to an Agilent 6400 series  
501 Triple Quadrupole (Agilent, USA). Ultra-high performance liquid chromatography (UHPLC)  
502 system was integrated with Agilent 6490 controlled by MassHunter software B.06.00.

503

504 For detection of gibberellins and auxin, 10  $\mu$ L of extracts was chromatographed on a Zorbax  
505 RRHD SB-C18 (50 mm length x 2.1 mm diameter, 1.8  $\mu$ m particle size) (Agilent, US) with  
506 column temperature set at 50°C and auto-sampler temperature was set at 4°C. The mobile  
507 phase consisted of water acidified with 0.1% formic acid (Solvent A) and acetonitrile  
508 acidified with 0.1% formic acid (Solvent B). A gradient elution (flow rate 300  $\mu$ L/min)  
509 consisting of 5% solvent B for 1 min followed by a linear gradient of 100% solvent B at 10.5  
510 min which was maintained till 13.4 min followed by 5% solvent B at 13.5 min to 16.5 min  
511 for re-equilibration. Mass spectrometric detection was performed with a Triple Quadrupole in  
512 negative mode with an Agilent Jet Stream ESI (G1958-65138) ion source using optimized  
513 monitoring reactions (**Supplementary Figure S3-S4; Supplementary Table S1**).

514

515 For detection of Trans-zeatin and Trans-zeatin riboside, 10  $\mu$ L of extracts were  
516 chromatographed on Kinetex C18 column (2.6  $\mu$ m C18 100 Å, 100 x 2.1 mm) (Phenomenex,  
517 USA) with column temperature set at 50°C and auto-sampler temperature was set at 4°C. The  
518 mobile phase consisted of water acidified with 0.08% acetic acid (Solvent A) and methanol  
519 (Solvent B). A gradient elution (flow rate 300  $\mu$ L/min) was used consisting of 5% of solvent  
520 B at 0 min followed 45% solvent B at 4 min; 75% B at 5 min, followed by 95% B at 5.1 and  
521 was maintained till 6.1 min followed by 5% solvent B at 6.2 min to 8.2 min for re-  
522 equilibration. Mass spectrometric detection was performed with a Triple Quadrupole in  
523 positive mode with an Agilent Jet Stream ESI (G1958-65138) ion source using optimized  
524 monitoring conditions (**Supplementary Figure S5; Supplementary Table S1**).

525

526 The mass spectrometer settings were as follows for all the phytohormones: source  
527 temperature 250°C, gas flow 12 L/min, nebulizer gas pressure 35 psi, sheath gas temperature  
528 350°C, sheath gas flow 11 L/min. Data were recorded in the multiple reaction monitoring  
529 mode. All data collection, mass spectrometric and statistical analyses were carried out with  
530 Mass Hunter Workstation software package: MH Acquisition B.05.00, MH Qualitative  
531 Analysis B.06.00. (Agilent Technologies, USA). All samples were randomized before LC-  
532 MS analyses.

533

### 534 **Statistical Analysis**

535

536 The data and comparison with controls were represented by using mean with standard error.  
537 The significance of differences between the control and treatments was statistically evaluated  
538 by GraphPad (<https://www.graphpad.com/quickcalcs/ttest1.cfm>). Differences were  
539 considered significant at a probability level of  $p < 0.05$  (\*) or  $p < 0.01$  (\*\*).

540

### 541 **DATA AVAILABILITY**

542 All datasets for this study are included in the manuscript and the Supplementary Files.

543

### 544 **AUTHOR CONTRIBUTIONS**

545

546 GK, NN designed the experiments. GK, PS, CC, YT performed the experiments; and GK co-  
547 wrote the manuscript with NN. PS helped in metabolite analyses and manuscript revision.  
548 GK, SS and NN analysed the data.

549

550 **FUNDING**

551

552 This work was supported by grants from the National Research Foundation (Prime Minister's  
553 Office; NRF-CRP16-2015-04) to SS and NN; and by intramural funds from the Temasek Life  
554 Sciences Laboratory (Singapore) to NN.

555

556 **ACKNOWLEDGMENTS**

557

558 We thank the Fungal Pathobiology group for useful discussions and suggestions. We thank  
559 Yu Hao for sharing the Arabidopsis *gal* mutant; and Prakash Kumar for providing the  
560 cytokinin standards. We would also like to acknowledge NUS Environmental Research  
561 Institute for technical support.

562

563

564

565

566

567

568

569

570

571

572

573

574

575

576

577

578

579

580

581

582

583

584

585

586

587

588

589

590

591

592

593

594

595

596

597

598

599 **TABLE 1**

600

601 **Fungus-derived Gibberellins and IAA produced by *P. citrinum* isolates under various**  
602 **experimental conditions.**

603

604

---

| 605 <b>Sample type</b>          | <b>GA1+GA3</b> | <b>GA20</b> | <b>GA4</b> | <b>IAA</b> |
|---------------------------------|----------------|-------------|------------|------------|
| 607 Complete medium             | -              | -           | -          | -          |
| 608 Culture filtrate (B9)       | -              | -           | -          | +          |
| 609 B9 mycelia                  | -              | -           | -          | -          |
| 610 Culture filtrate (B9+PAC)   | -              | -           | -          | +          |
| 611 B9+PAC mycelia              | -              | -           | -          | -          |
| 612 Culture filtrate (FLP7)     | +              | +           | -          | +          |
| 613 FLP7 mycelia                | -              | -           | -          | -          |
| 614 Culture filtrate (FLP7+PAC) | -              | -           | -          | +          |
| 615 FLP7+PAC mycelia            | -              | -           | -          | -          |

---

616

617 \*Low abundance

618 Culture Filtrate refers to the total cell-free exudates in the growth medium.

619 PAC refers to Paclobutrazol.

620

621

622

623

624

625

626

627

628

629

630

631

632

633

634

635

636

637

638

639

640 **TABLE 2**

641

642 Oligonucleotide primers used in this study.

643

644

645 **Name**

**Sequence (5'-3')**

**References**

646

647

ITS1

TCCGTAGGTGAACCTGCGG

(White et al., 1990)

648

ITS4

TCCTCCGCTTATTGATATGC

(White et al., 1990)

649

eGFP-F1

TGGTGAGCAAGGGCGAGGAG

This study

650

eGFP-R1

CGTCCATGCCGAGAGTGATCC

This study

651

Hyg-F1

TCTCCGACCTGATGCAGCTCTC

This study

652

Hyg-R1

TACACAGCCATCGGTCCAGACG

This study

653

LSU-F

ACCCGCTGAACTTAAGC

(Schoch et al., 2012)

654

LSU-R

TCCTGAGGGAACTTCG

(Schoch et al., 2012),

655

SSU-F

GTAGTCATATGCTTGTCTC

(Schoch et al., 2012)

656

SSU-R

CTTCCGTCAATTCCTTTAAG

(Schoch et al., 2012)

657

658

659

660

661

662

663

664

665

666

667

668

669

670

671

672

673

674

675

676

677

678

679

680 **REFERENCES**

681

- 682 Babu, A.G., Kim, S.W., Yadav, D.R., Hyum, U., Adhikari, M., and Lee, Y.S. (2015).  
683 *Penicillium menonorum*: a novel fungus to promote growth and nutrient management  
684 in cucumber plants. *Mycobiology* 43, 49-56.
- 685 Choi, W.-Y., Rim, S.-O., Lee, J.-H., Lee, J.-M., Lee, I.-J., Cho, K.-J., Rhee, I.-K., Kwon, J.-  
686 B., and Kim, J.-G. (2005). Isolation of gibberellins-producing fungi from the root of  
687 several *Sesamum indicum* plants. *Journal of microbiology and biotechnology* 15, 22-  
688 28.
- 689 Dovana, F., Mucciarelli, M., Mascarello, M., and Fusconi, A. (2015). In vitro morphogenesis  
690 of *Arabidopsis* to search for novel endophytic fungi modulating plant growth. *PloS*  
691 *one* 10, e0143353.
- 692 Fan, Y., Luan, Y., An, L., and Yu, K. (2008). Arbuscular mycorrhizae formed by *Penicillium*  
693 *pinophilum* improve the growth, nutrient uptake and photosynthesis of strawberry  
694 with two inoculum-types. *Biotechnology letters* 30, 1489.
- 695 Fletcher, R.A., Sopher, C.R., and Vettakkorumakankav, N.N. (2000). Modulation of  
696 gibberellins protects plants from environmental stresses. *Indian Journal of Plant*  
697 *Physiology* 5, 115-126.
- 698 Hasan, H. (2002). Gibberellin and auxin production by plant root-fungi and their biosynthesis  
699 under salinity-calcium interaction. *Rostlinna vyroba* 48, 101-106.
- 700 Hung, R., Lee, S., and Bennett, J.W. (2013). *Arabidopsis thaliana* as a model system for  
701 testing the effect of *Trichoderma* volatile organic compounds. *Fungal ecology* 6, 19-  
702 26.
- 703 Jalali, F., Zafari, D., and Salari, H. (2017). Volatile organic compounds of some *Trichoderma*  
704 spp. increase growth and induce salt tolerance in *Arabidopsis thaliana*. *Fungal*  
705 *ecology* 29, 67-75.
- 706 Khalmuratova, I., Kim, H., Nam, Y.-J., Oh, Y., Jeong, M.-J., Choi, H.-R., You, Y.-H., Choo,  
707 Y.-S., Lee, I.-J., and Shin, J.-H. (2015). Diversity and plant growth promoting  
708 capacity of endophytic fungi associated with halophytic plants from the west coast of  
709 Korea. *Mycobiology* 43, 373-383.
- 710 Khan, A.L., Hamayun, M., Kim, Y.H., Kang, S.M., Lee, J.H., Lee, I.J. (2011). Gibberellins  
711 producing endophytic *Aspergillus fumigatus* sp. LH02 influenced endogenous  
712 phytohormonal levels, isoflavonoids production and plant growth in salinity stress.  
713 *Process Biochem.*, 46, pp. 440-447.
- 714 Khan, A.L., Hamayun, M., Kang, S.-M., Kim, Y.-H., Jung, H.-Y., Lee, J.-H., and Lee, I.-J.  
715 (2012). Endophytic fungal association via gibberellins and indole acetic acid can  
716 improve plant growth under abiotic stress: an example of *Paecilomyces formosus*  
717 LHL10. *BMC microbiology* 12, 3.
- 718 Mabood, F., Zhou, X., and Smith, D.L. (2014). Microbial signaling and plant growth  
719 promotion. *Canadian journal of plant science* 94, 1051-1063.
- 720 Morrison, E.N., Knowles, S., Hayward, A., Thorn, R.G., Saville, B., J., Emery, R.J.N. (2015).  
721 Detection of phytohormones in temperate forest fungi predicts consistent abscisic acid  
722 production and a common pathway for cytokinin biosynthesis, *Mycologia*, 107:2,  
723 245-257.
- 724 Nassar, A.H., El-Tarabily, K.A., and Sivasithamparam, K. (2005). Promotion of plant growth  
725 by an auxin-producing isolate of the yeast *Williopsis saturnus* endophytic in maize  
726 (*Zea mays* L.) roots. *Biology and Fertility of soils* 42, 97-108.
- 727 Naznin, H.A., Kimura, M., Miyazawa, M., and Hyakumachi, M. (2013). Analysis of volatile  
728 organic compounds emitted by plant growth-promoting fungus *Phoma* sp. GS8-3 for  
729 growth promotion effects on tobacco. *Microbes and environments* 28, 42-49.

- 730 Rim, S.-O., Lee, J.-H., Choi, W.-Y., Hwang, S.-K., Seok, J.-S., Lee, I.-J., Rhee, I.-K., and  
731 Kim, J.-G. (2005). *Fusarium proliferatum* KGL0401 as a new gibberellin-producing  
732 fungus. *Journal of microbiology and biotechnology* 15, 809-814.
- 733 Schoch, C.L., Seifert, K.A., Huhndorf, S., Robert, V., Spouge, J.L., Levesque, C.A., Chen,  
734 W., and Consortium, F.B. (2012). Nuclear ribosomal internal transcribed spacer (ITS)  
735 region as a universal DNA barcode marker for Fungi. *Proceedings of the National*  
736 *Academy of Sciences* 109, 6241-6246.
- 737 Vacheron, J., Desbrosses, G., Bouffaud, M.-L., Touraine, B., Moëgne-Loccoz, Y., Muller, D.,  
738 Legendre, L., Wisniewski-Dyé, F., and Prigent-Combaret, C. (2013). Plant growth-  
739 promoting rhizobacteria and root system functioning. *Frontiers in plant science* 4,  
740 356.
- 741 Verma, A., Jain, N., and Kaur, B. (2010). Regulation of Plant Behavior through Potential  
742 Anti Gibberellins Compounds. *The Journal of Plant Science Research* 26, 227.
- 743 Waqas, M., Khan, A.L., Kamran, M., Hamayun, M., Kang, S.-M., Kim, Y.-H., and Lee, I.-J.  
744 (2012). Endophytic fungi produce gibberellins and indoleacetic acid and promotes  
745 host-plant growth during stress. *Molecules* 17, 10754-10773.
- 746 White, T.J., Bruns, T., Lee, S., and Taylor, J. (1990). Amplification and direct sequencing of  
747 fungal ribosomal RNA genes for phylogenetics. *PCR protocols: a guide to methods*  
748 *and applications* 18, 315-322.
- 749 Yin, Z., Shi, F., Jiang, H., Roberts, D.P., Chen, S., and Fan, B. (2015). Phosphate  
750 solubilization and promotion of maize growth by *Penicillium oxalicum* P4 and  
751 *Aspergillus niger* P85 in a calcareous soil. *Canadian journal of microbiology* 61, 913-  
752 923.
- 753 Zheng, W., Zhou, J., He, Y., Xie, Q., Chen, A., Zheng, H., Shi, L., Zhao, X., Zhang, C., and  
754 Huang, Q. (2015). Retromer is essential for autophagy-dependent plant infection by  
755 the rice blast fungus. *PLoS genetics* 11, e1005704.

756

757 **CONFLICT OF INTEREST STATEMENT:**

758

759 The authors declare that there is no conflict of interest.

760

761



**Figure 1:**

The morphological traits of Choy Sum inoculated with *P. citrinum*, and its plant growth promotion effect in sterilized soil (A and C) or non-sterile soil (B and D). (A and C) The morphology and growth characteristics of Choy Sum plants grown in non-autoclaved soil for 21 days (left, water; right, B9 inoculated). (E to H) Bar charts showing quantification of the fresh and dry weight of shoots/aerial parts (E and G) and roots (F and H) under the two growth conditions, respectively. Data represents mean  $\pm$  SD from 3 replicates consisting of 8 plants in each instance. Differences were considered significant at a probability level of  $p < 0.05$  (\*) or  $p < 0.01$  (\*\*).

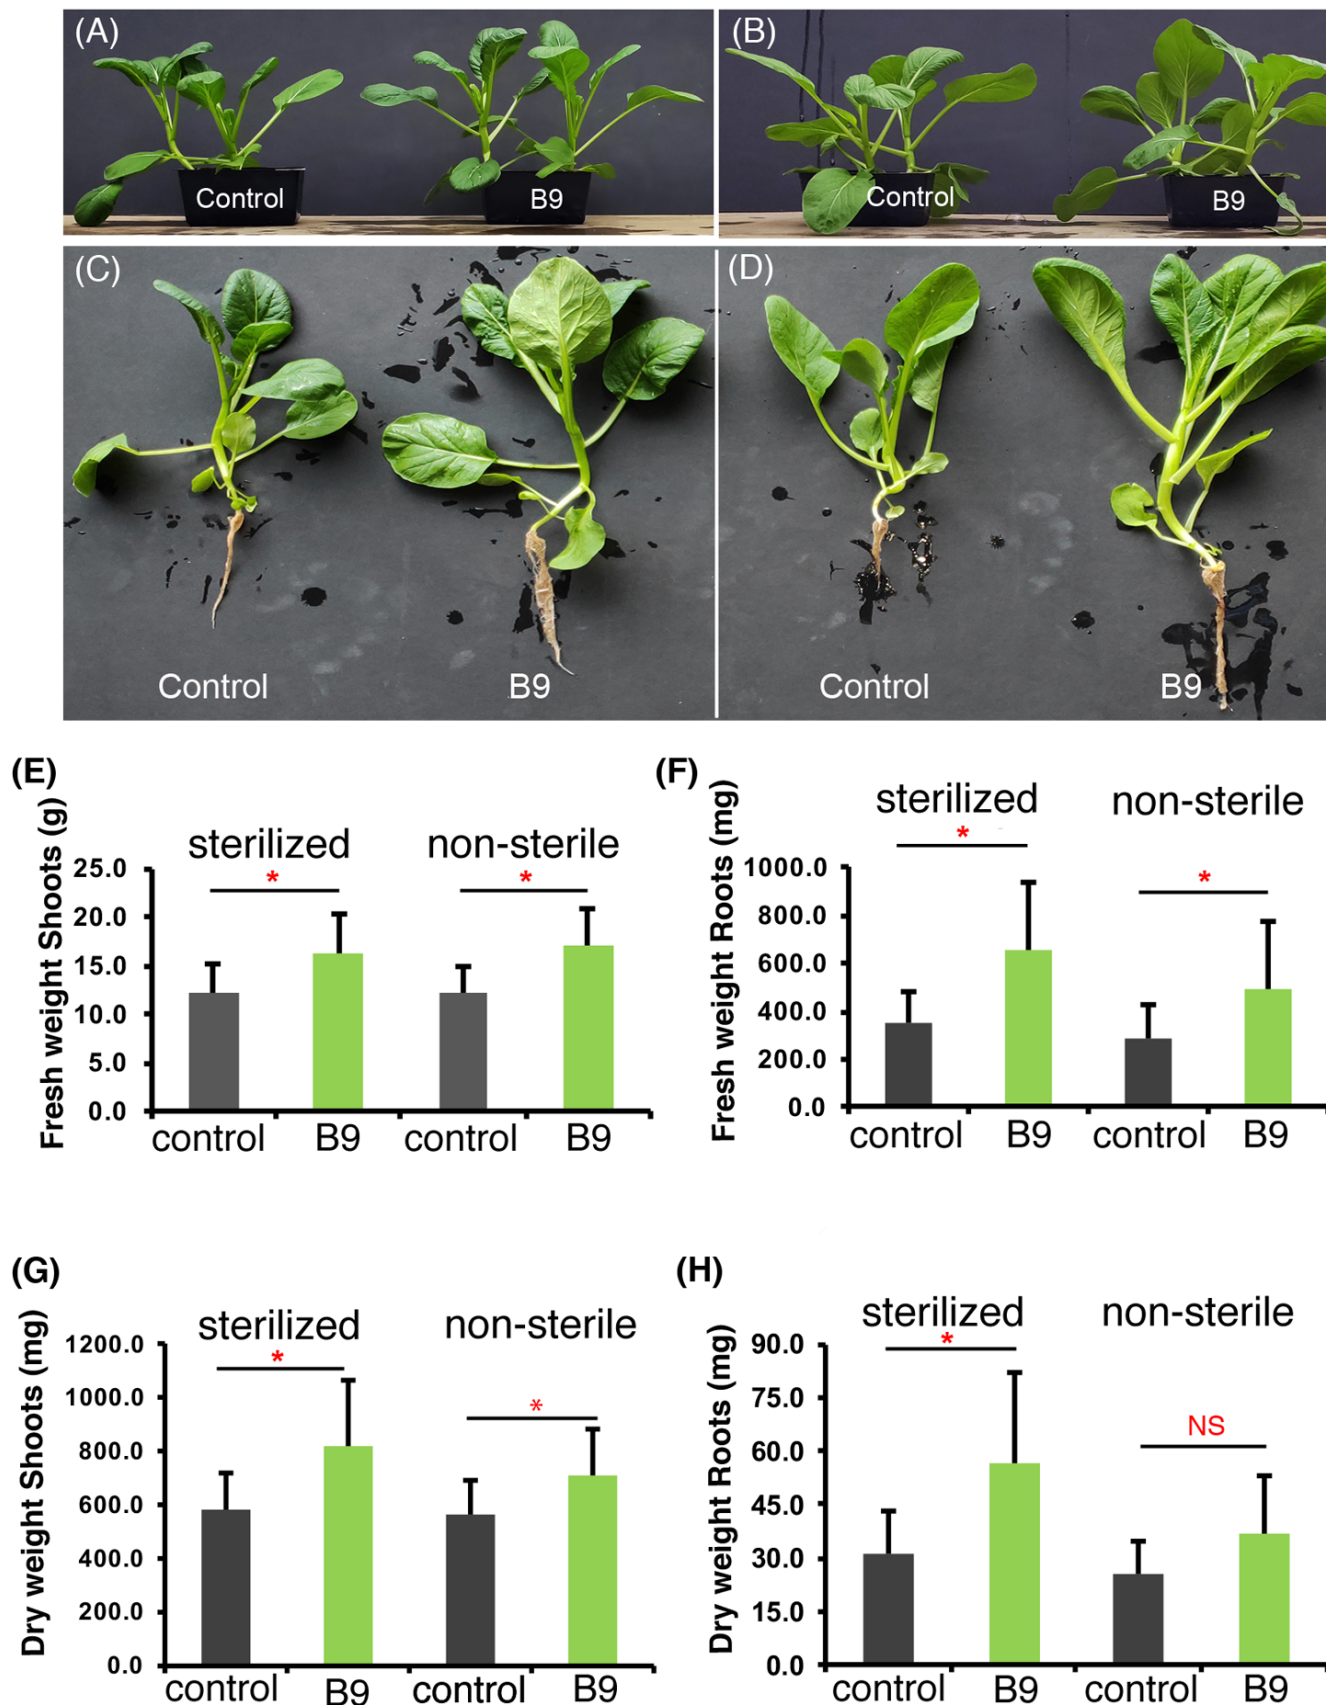

**Figure 2:**

Analyzing the effect of *P. citrinum* FLP7 isolate on the growth of Choy Sum under phosphate-limiting conditions. (A) The morphological traits for Choy Sum treated with FLP7 conidia or with water as control. The average leaf area (cm<sup>2</sup>), root length (cm), the dry weight of roots and aerial parts (mg) were determined from both FLP7-treated seedlings and the mock control plants. Data represents mean±SD from 3 replicates consisting of 8 plants in each instance.

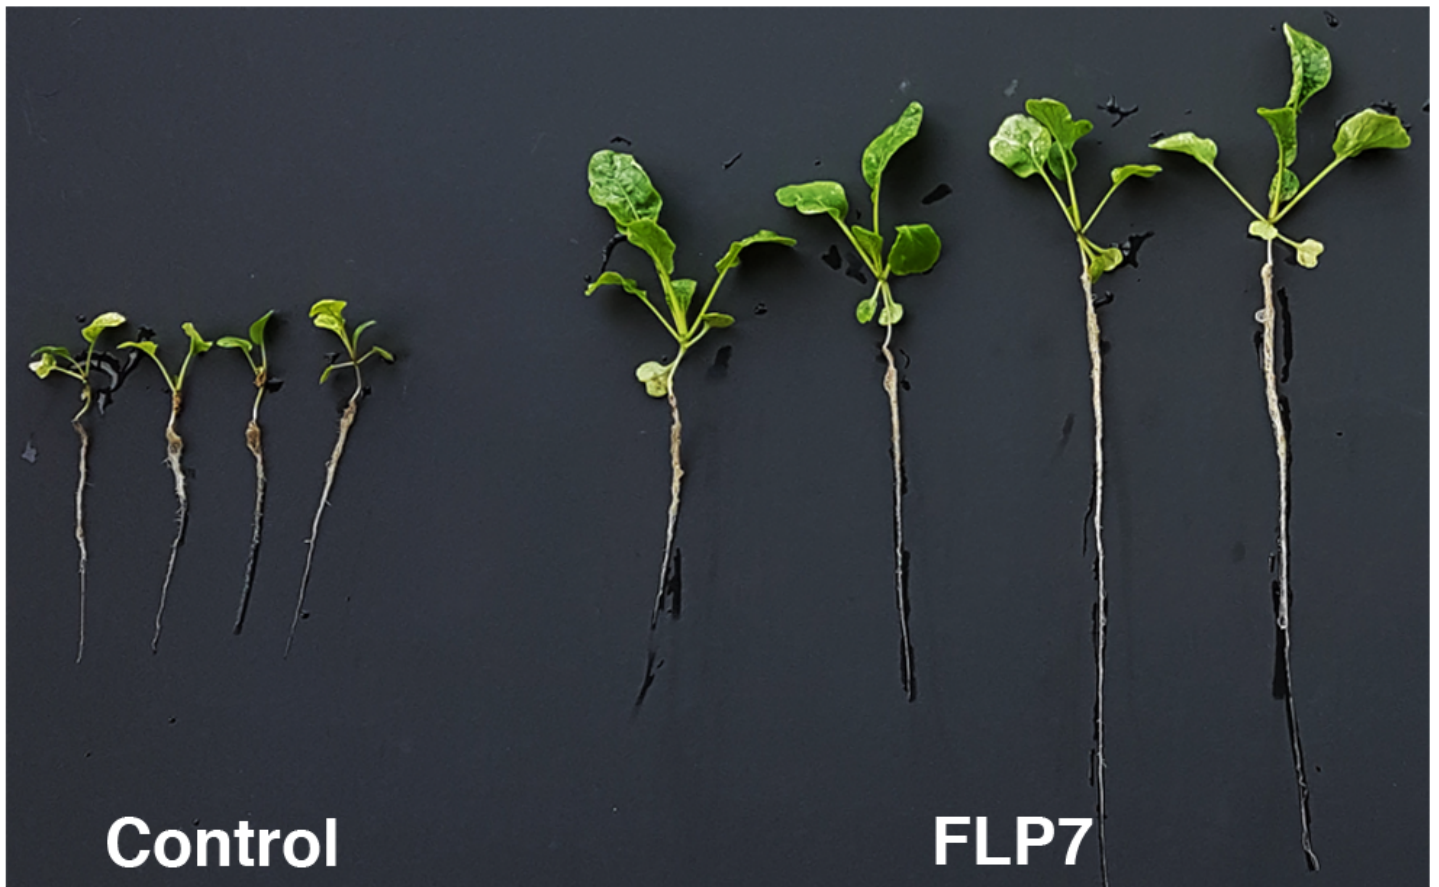



### Figure 3

Volatile organic compounds from *P. citrinum* isolates stimulate robust seedling growth in Choy Sum. (A) The morphological traits of Choy Sum seedlings grown in triplicate for 10 days (B) the seedlings from (A); (C-F), quantification of the fresh and dry weight of shoots (C and D) and roots (E and F) from the seedlings incubated individually with FLP7 or B9. Data represents mean  $\pm$  SD from 3 replicates each consisting of 8 plants. Barium hydroxide was used to quench excess carbon dioxide produced during fungal growth or metabolism. Control (mock) inoculation used the growth medium (PA, Prune Agar) without any fungus. Differences were deemed significant at a probability level of  $p < 0.05$  (\*) or  $p < 0.01$  (\*\*\*)

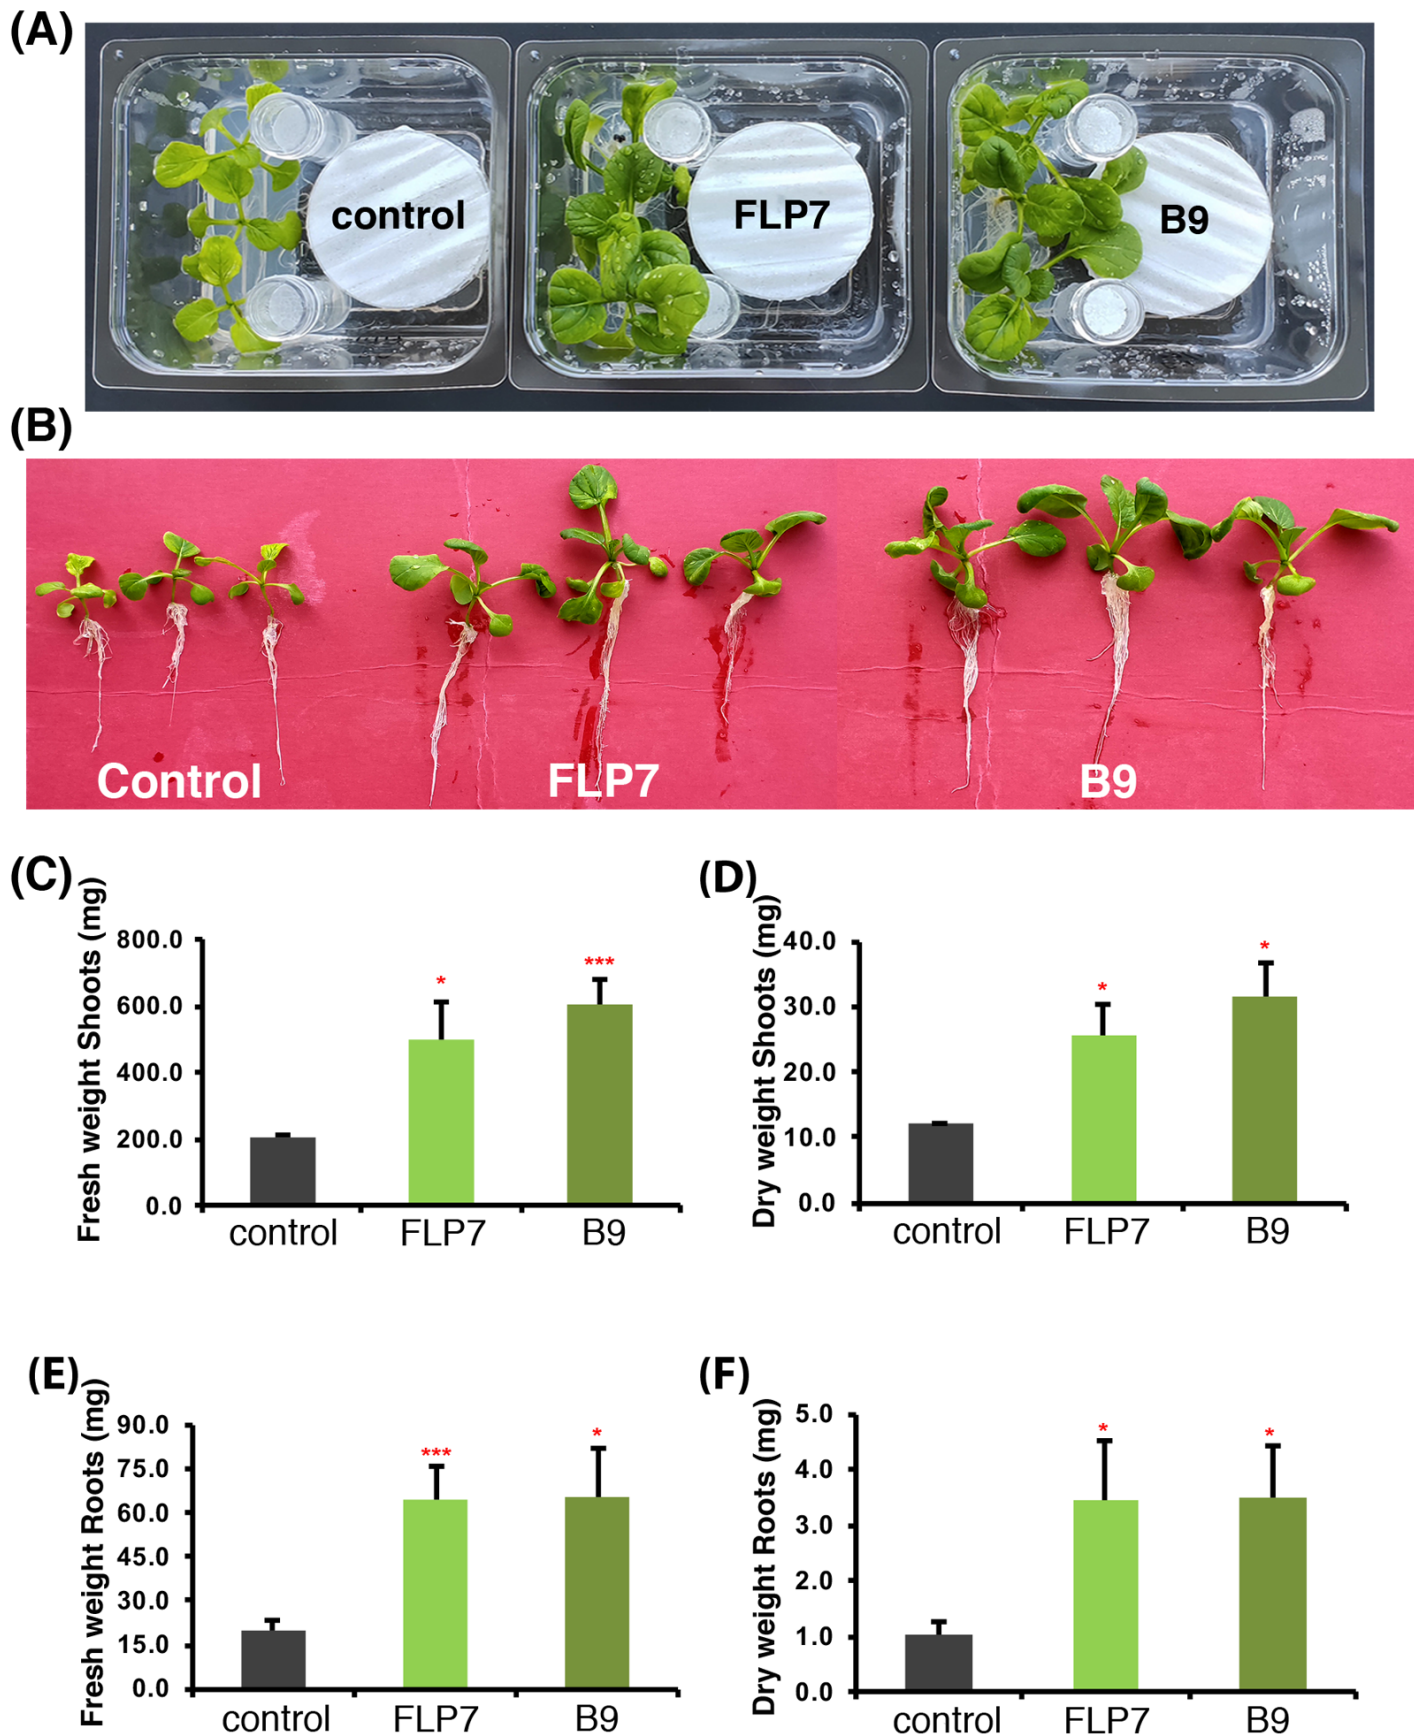

#### Figure 4

Confocal micrographs of Choy Sum roots incubated with eGFP-expressing FLP7 or B9 strains of *P. citrinum*. Choy Sum roots were incubated with  $1 \times 10^7$  spores/mL at day 3 post-germination. The root colonization was analyzed at 1, 2 and 3 day after incubation. Confocal microscopic images of Choy Sum roots incubated with eGFP-FLP7 (A) or B9 (B) strains, respectively. Root tissues were stained with Propidium iodide. GFP, green fluorescent protein; BF, bright field, PI, Propidium iodide, Merge, composite of the GFP, PI and BF channels.

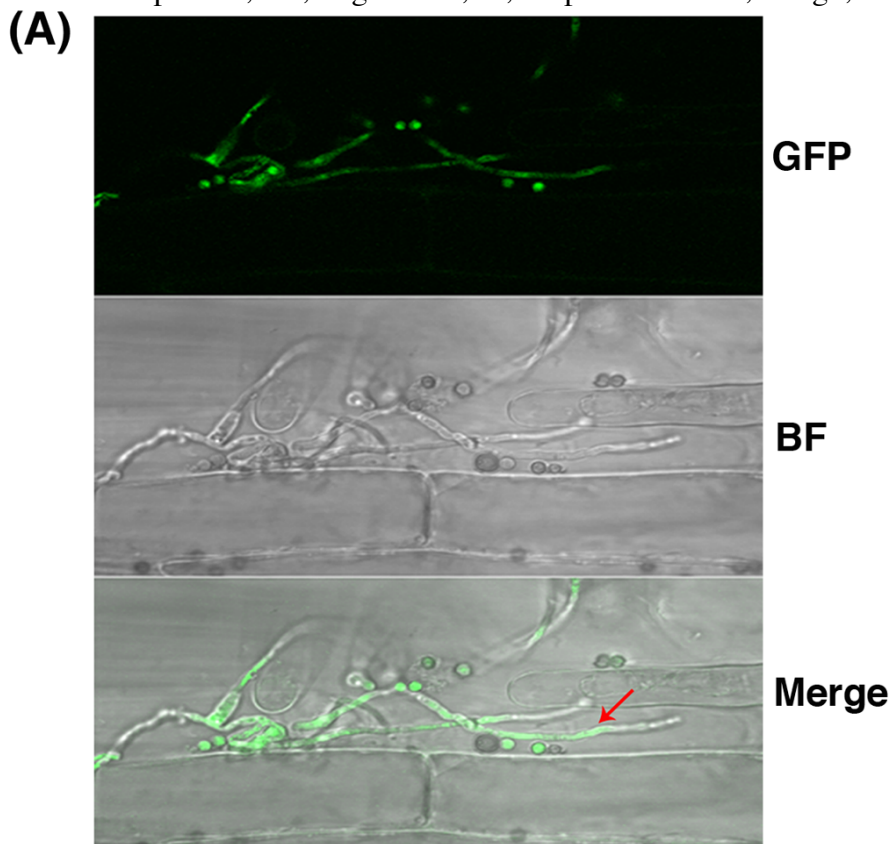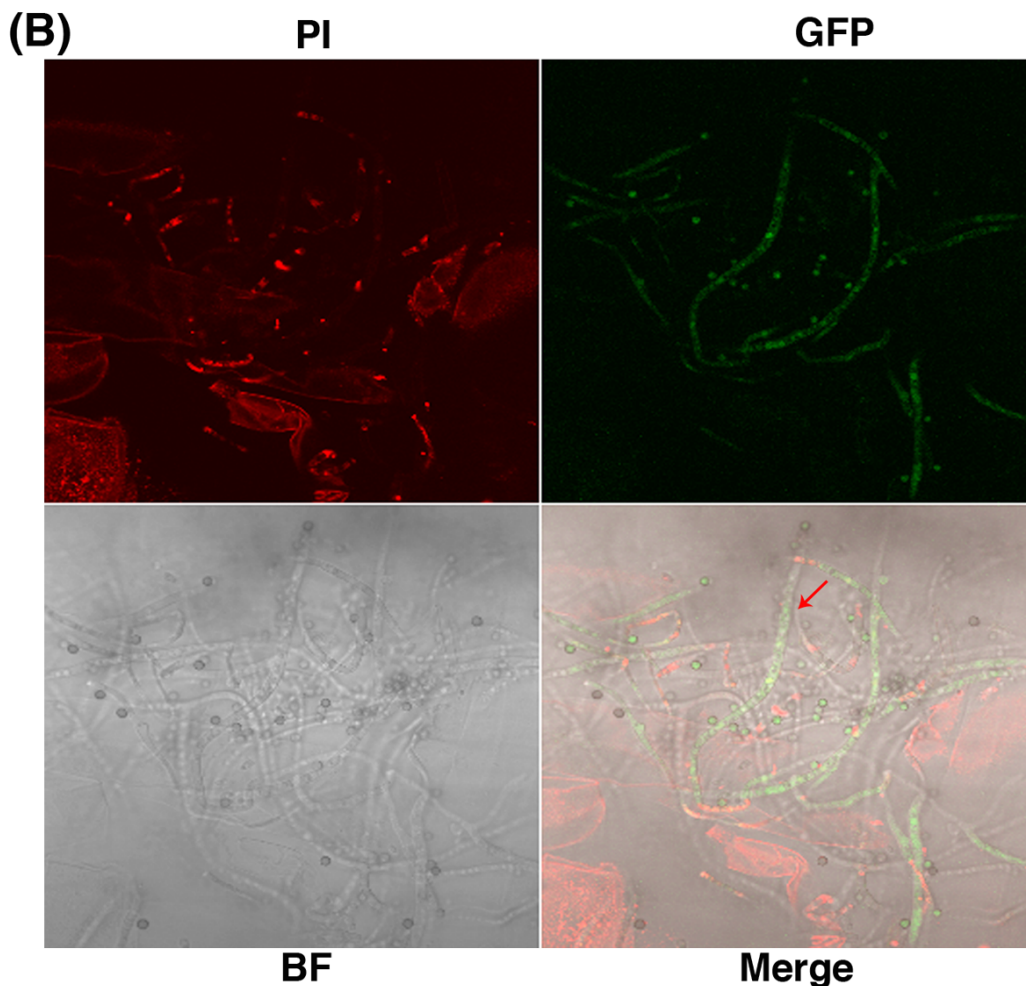



## Figure 5

The effect of *P. citrinum* on the growth of *Arabidopsis gal* mutant and wild-type accession Col-0. (A) The morphological traits of *Arabidopsis gal* mutant in the presence or absence of exudates from *P. citrinum*. Cultures grown in complete medium. (B) Wild-type *Arabidopsis Col-0* treated with culture filtrate from *P. citrinum*. Control refers to the mock inoculation with equivalent amount of growth medium without the fungus. (C) Gibberellin(s) produced by *P. citrinum* contribute in part to growth promotion in Choy Sum. The culture filtrate from the indicated *P. citrinum* isolate grown in complete medium in the presence or absence of Paclobutrazol (the gibberellin biosynthesis inhibitor) was inoculated on Choy Sum seeds. Control refers to mock inoculation with sterile growth medium in the absence of the fungus.

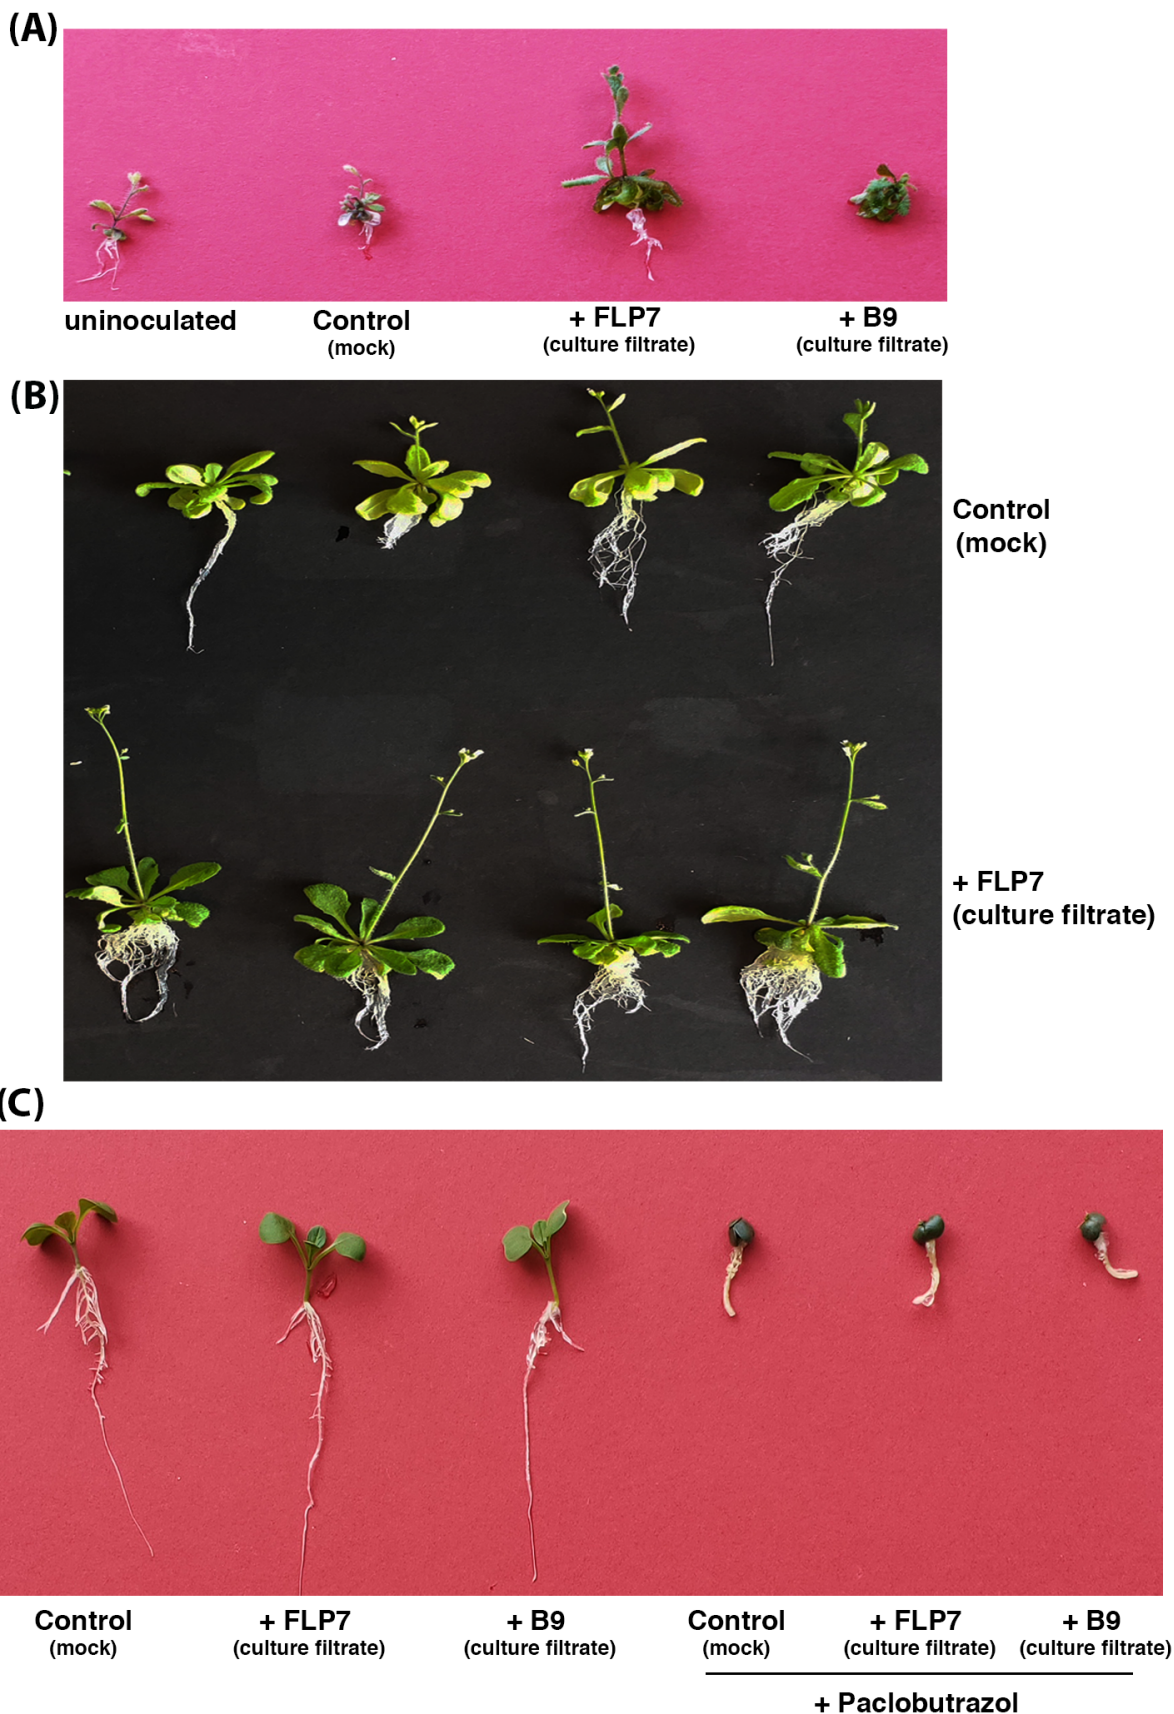

Source: https://www.biorxiv.org/content/biorxiv/early/2020/02/04/2020.02.04.933770.full.pdf
